# Supplementary material for: Source localization of epileptiform discharges in childhood absence epilepsy using a distributed source model: a standardized, low-resolution, brain electromagnetic tomography (sLORETA) study
Source: Springer Nature journal article supplement (doi:10.1007/s10072-019-03751-4), 2019-02-12
Supplement: MOESM1 [file 16469000]

## Sheet: Sheet1
1. Number and locations of sources at the midpoint of the ascending phase of epileptiform discharges from each patient with childhood absence epilepsy.
	patient number	1		2		3		4		5		6		7		8		9		10		11		12		13		14		15		16
Lobe		L	R	L	R	L	R	L	R	L	R	L	R	L	R	L	R	L	R	L	R	L	R	L	R	L	R	L	R	L	R	L	R	L	R
Frontal	sup. frontal gy.	4	6	1	2	1	2			1	3		2	2	5		2		2			1	3	1	1		1		2		2		1	11	34	45
82	middle frontal gy.	2		2			1		1				1		2					1						1			1	2	1			8	7	15
	inf. frontal gy.	2						1															1				1							3	2	5
	medial frontal gy.					1	1				1				3		1			1		1	2						3					3	11	14
	precentral gy													1																				1	0	1
	rectal gy.			1																			1											1	1	2
Temporal	sup. temporal gy.			1							1														1									1	2	3
10	middle temporal gy.								1	1									1											2				3	2	5
	inf. temoral gy.											1																						1	0	1
	angular gy.																		1															0	1	1
Parietal	postcentral gy.						1																											0	1	1
14	sup. pariteal lobule													1						1				1										3	0	3
	inf. paritetla lobule														1											1				1				2	1	3
	precuneous		1				2			1															1				1					1	5	6
	inf. partrietal gy.													1																				1	0	1
Occipital	middle occipital gy.	1								1					4											1			1					3	5	8
15	inf occipital gy.					1																												1	0	1
	lingual gy.					1																				1								2	0	2
	cuneous									1	1												1							1				2	2	4
		9	7	5	2	4	7	1	2	5	6	1	3	5	15	0	3	0	4	3	0	2	8	2	3	4	2	0	8	6	3	0	1	47	74
		16		7		11		3		11		4		20		3		4		3		10		5		6		8		9		1				121
2. Number and locations of sources at the negative peak of epileptiform discharges from each patient with childhood absence epilepsy.
	patient nubmer	1		2		3		4		5		6		7		8		9		10		11		12		13		14		15		16
Lobe		L	R	L	R	L	R	L	R	L	R	L	R	L	R	L	R	L	R	L	R	L	R	L	R	L	R	L	R	L	R	L	R	L	R
Frontal	sup. frontal gy.	3	6	2	1	1	4			2	4		1	1	7		2		1		1	1	3	1	1	1			2	1	3		1	13	37	50
86	middle frontal gy.	2		2			1		1				2		5				1				2						2	1				5	14	19
	inf. frontal gy.	1			1			1						1	1		1										1							3	4	7
	medial frontal gy.	2	1																		1		1						2					2	5	7
	precentral gy			1										1																				2	0	2
	rectal gy.																						1											0	1	1
Temporal	sup. temporal gy.																						1							2				2	1	3
11	middle temporal gy.								1						1				2											1				1	4	5
	inf. temoral gy.									1		1															1							2	1	3
Parietal	postcentral gy.						1																		1									0	2	2
13	sup. pariteal lobule						1			1										1				1										2	2	4
	inf. paritetla lobule														1											1								1	1	2
	precuneous		1				1																		1				1					0	4	4
	inf. partrietal gy.													1																				1	0	1
Occipital	middle occipital gy.									2					1											2								4	1	5
11	inf occipital gy.					1																												1	0	1
	lingual gy.					1																												1	0	1
	cuneous										1												1						1	1				1	3	4
		8	8	5	2	3	8	1	2	6	5	1	3	4	16	0	3	0	4	1	2	1	9	2	3	4	2	0	8	6	3	0	1	41	80
		16		7		11		3		11		4		20		3		4		3		10		5		6		8		9		1				121
